# Supplementary material
Source: publisher figshare collection journal article supplement (https://karger.figshare.com/ndownloader/files/10968377)
Supplement: Supplementary file 1 [file 10968377]

**Supplemental Table 2.** Proportional frequencies of main pathological subtypes of stroke among patients <65 years vs. ≥65 years

| **Variable** | **<65 years (n=80)** | **≥65 years (n=333)** | ***p**** |
| --- | --- | --- | --- |
|  |  |  |  |
| **Pathological subtype of stroke, n (%)** |  |  | <0.001 |
| *Cerebral infarct* | 59 (74) | 275 (83) |  |
| *Intracerebral hemorrhage* | 10 (17) | 50 (15) |  |
| *Subarachnoid hemorrhage* | 11 (14) | 3 (1) |  |
| *Undetermined* | 0 (0) | 5 (2) |  |

*Fisher’s exact test.
